# Supplementary material for: Characterization and Antimicrobial Activity of Amphiphilic Peptide AP3 and Derivative Sequences
Source: PubMed Central journal article supplement (PMC6466588; doi:10.3390/antibiotics8010020), 2019-03-06
Supplement: antibiotics-08-00020-s001.pdf [file antibiotics-08-00020-s001.pdf]

Article

# Characterization and Antimicrobial Activity of Amphiphilic Peptide AP3 and Derivative Sequences

Christina L. Chrom <sup>1</sup>, Lindsay M. Renn <sup>1</sup> and Gregory A. Caputo <sup>1,2,\*</sup>

<sup>1</sup> Department of Chemistry and Biochemistry, Rowan University, Glassboro NJ 08028, USA; chromc95@rowan.edu (C.L.C.); rennl28@rowan.edu (L.M.R.)

<sup>2</sup> Department of Molecular and Cellular Biosciences, Rowan University, Glassboro NJ 08028, USA

\* Correspondence: caputo@rowan.edu

## Supplementary Materials

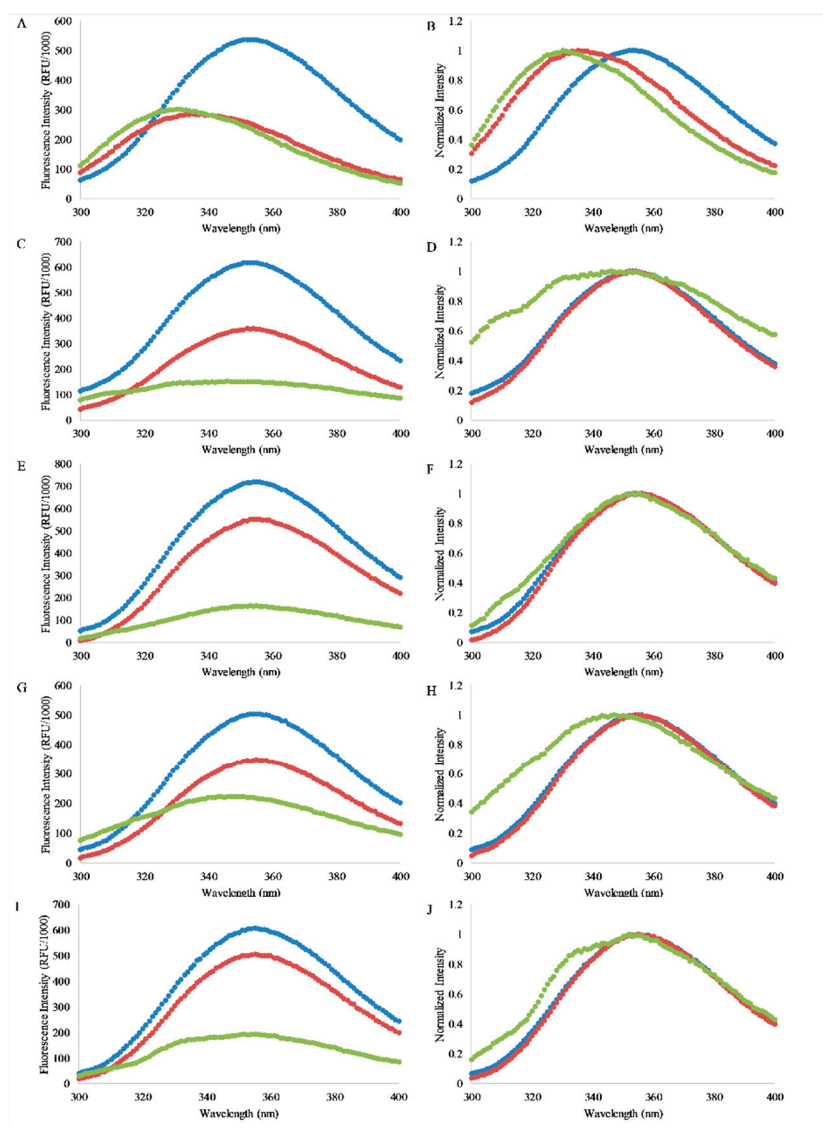

**Figure S1.** Trp emission spectra of peptides in buffer (blue), bound to 90 M PC:PG vesicles (red), or bound to 300 M PC:PG vesicles. The left column shows raw intensities while the right column shows normalized intensity for ease of comparison for spectral shifts. (A,B) AP3, (C,D) AP3K, (E,F) APX, (G,H) APX-17, (I,J) APX-12. Peptide concentration was 2  $\mu$ M in all cases. Representative spectra are shown after correction for background fluorescence.

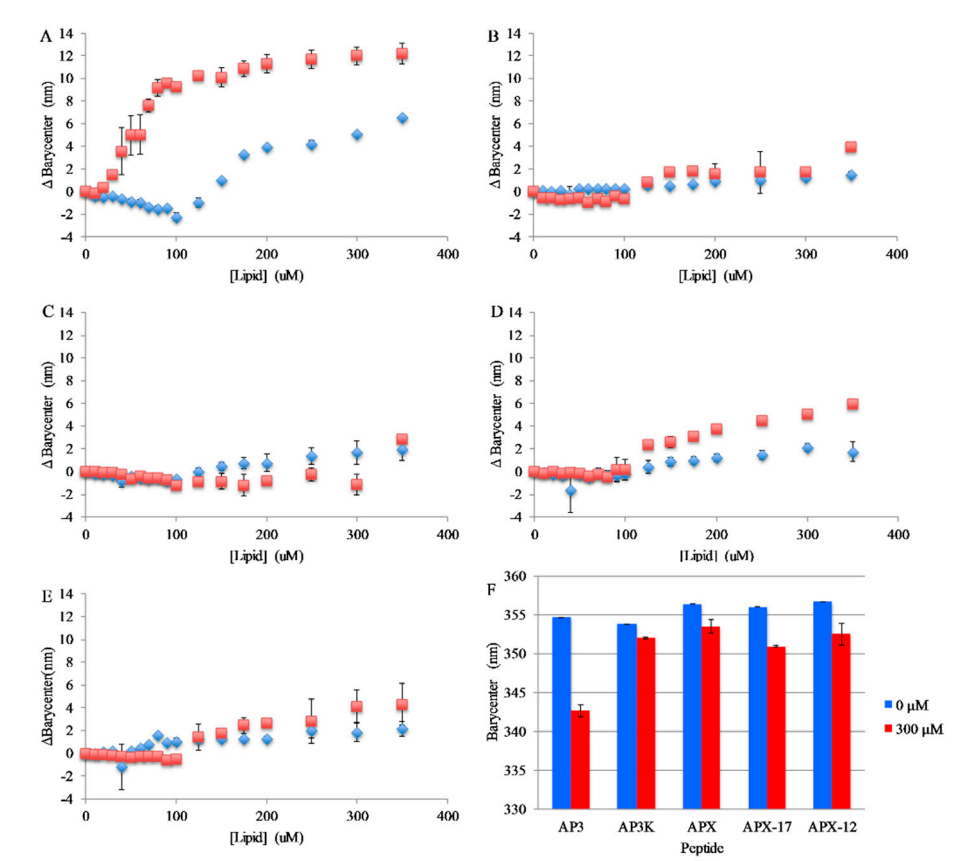

**Figure S2.** Peptide binding to Lipid Vesicles by Spectral shifts—Binding of AP peptides to lipid vesicles analyzed by change in emission spectrum barycenter as a function of lipid concentration. (A) AP3, (B) AP3K, (C) APX, (D) APX-17, (E) APX-12. Each peptide was titrated with either 75:25 PC:PG (red squares) or 100% PC (blue diamonds) vesicles. (F) Barycenter comparison of peptides in solution (blue) and bound to 300  $\mu$ M PC:PG vesicles (red). Peptide concentration was 2  $\mu$ M in all cases. Data shown are corrected for background fluorescence and represent averages of at least three replicate samples.

**Table 1.** Acrylamide  $K_{sv}$  ( $M^{-1}$ ,  $cm^{-1}$ )<sup>a</sup>.

| Peptide | Buffer | PC/PG |
|---------|--------|-------|
| AP3     | 4.78   | 1.92  |
| AP3K    | 5.82   | 4.71  |
| APX     | 4.99   | 1.61  |
| APX-12  | 6.61   | 6.21  |
| APX-17  | 4.22   | 8.61  |

a.  $K_{sv}$  values derived from the linear fits of acrylamide quenching shown in Figure 3.

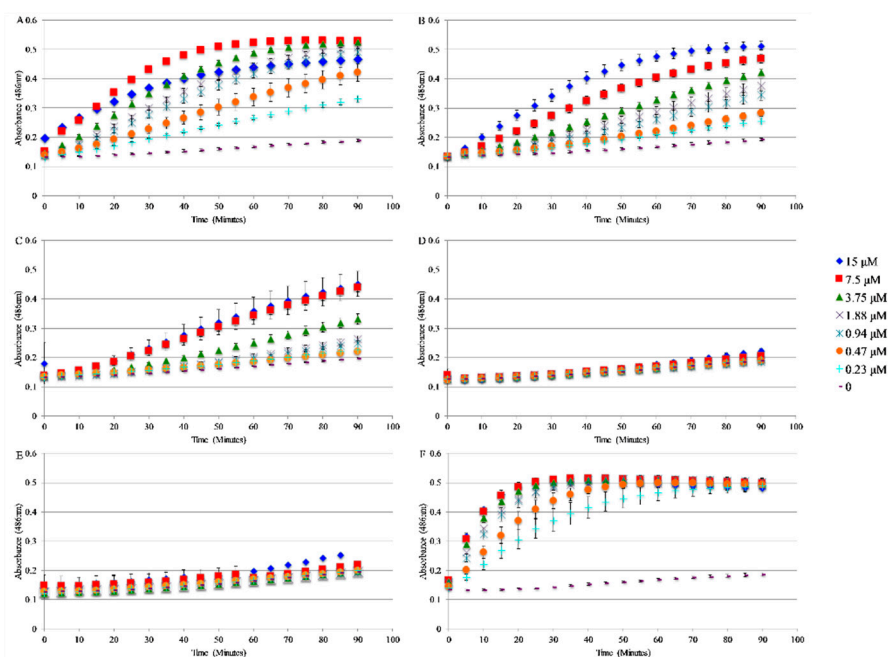

**Figure S3.** Time course of Outer-membrane permeabilization: Outer-membrane permeability of *E. coli* after treatment with peptides (A) AP3, (B) AP3K, (C) APX, (D) APX-17, (E) APX-12 or (F) the control Polymyxin B sulfate. For all graphs peptide concentration is shown in the legend. Samples contained 50 μg/mL nitrocefin, and 80 uL of resuspended *E. coli* cell suspension, and 10 μL peptide from a stock solution for the appropriate final concentration. Absorbance values shown represent data collected over 90 minutes of exposure to peptide. Data are averages of at least three replicate samples.

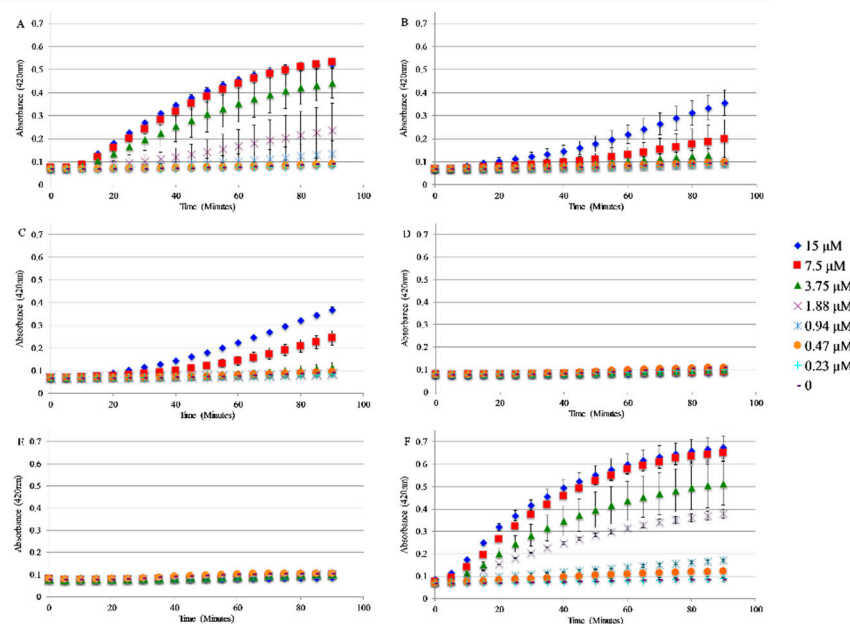

**Figure S4.** Time course of Inner-membrane permeabilization: Inner-membrane permeability of *E. coli* after treatment with peptides (A) AP3, (B) AP3K, (C) APX, (D) APX-17, (E) APX-12 or (F) the control detergent CTAB. For all graphs peptide concentration is shown in the legend. Samples contained 56.25 uL Z-buffer (100 mM Na<sub>2</sub>HPO<sub>4</sub>, 10 mM KCl, 1 mM MgSO<sub>4</sub>, 40 mM β- mercaptoethanol, pH 7.1), 12 μL ONPG (4mg/ml), 18.75 uL *E. coli*, (5.0 × 10<sup>5</sup> cfu/ml) and 10 μL of peptide from the appropriate final concentrations. Absorbance values shown represents data collected after 90 minutes of exposure of peptide. Data are averages of at least three replicate samples.
